# Supplementary material for: Key determinants of target DNA recognition by retroviral intasomes
Source: PubMed Central journal article supplement (PMC4422553; doi:10.1186/s12977-015-0167-3), 2015-04-30
Supplement: 12977_2015_167_MOESM1_ESM.pdf [file 12977_2015_167_MOESM1_ESM.pdf]

|              | R   | G   | G   | D   | G   | S   | Y   | R   | S   | C   | A/H | C   | C   | H   | C   |
|--------------|-----|-----|-----|-----|-----|-----|-----|-----|-----|-----|-----|-----|-----|-----|-----|
| PFV (2,924)* | -5  | -4  | -3  | -2  | -1  | 0   | 1   | 2   | 3   | 4   | 5   | 6   | 7   | 8   | 9   |
| A            | 119 | 87  | 100 | 111 | 75  | 85  | 78  | 124 | 31  | 78  | 132 | 93  | 84  | 91  | 82  |
| C            | 72  | 102 | 74  | 50  | 82  | 165 | 131 | 70  | 157 | 177 | 92  | 130 | 145 | 109 | 141 |
| G            | 119 | 146 | 137 | 94  | 187 | 159 | 70  | 128 | 169 | 81  | 54  | 74  | 103 | 75  | 102 |
| T            | 87  | 79  | 93  | 129 | 81  | 28  | 120 | 78  | 83  | 82  | 106 | 103 | 81  | 121 | 89  |
| #-log(P)     | 23  | 39  | 27  | 50  | 116 | 200 | 40  | 42  | 201 | 95  | 46  | 20  | 38  | 18  | 30  |

|                | R   | G   | S    | T/W  | G/S  | S/V  | T    | V    | S/B  | C    | A    | G/V | C/B  | B   | B   |
|----------------|-----|-----|------|------|------|------|------|------|------|------|------|-----|------|-----|-----|
| MoMLV (53,463) | -5  | -4  | -3   | -2   | -1   | 0    | 1    | 2    | 3    | 4    | 5    | 6   | 7    | 8   | 9   |
| A              | 112 | 98  | 82   | 80   | 80   | 110  | 77   | 119  | 59   | 75   | 178  | 101 | 79   | 79  | 85  |
| C              | 93  | 102 | 130  | 49   | 118  | 136  | 93   | 98   | 120  | 137  | 58   | 107 | 132  | 120 | 118 |
| G              | 118 | 123 | 126  | 31   | 132  | 146  | 84   | 110  | 128  | 123  | 61   | 123 | 106  | 96  | 104 |
| T              | 81  | 84  | 79   | 205  | 87   | 31   | 139  | 76   | 109  | 83   | 79   | 78  | 93   | 111 | 100 |
| #-log(P)       | 257 | 211 | >301 | >301 | >301 | >301 | >301 | >301 | >301 | >301 | >301 | 301 | >301 | 294 | 160 |

|              | G/V | G/S | S   | T/W | G   | G/V | T/Y | A   | C/B | C/S | A/W | S   | C/S | C/B | C/S |
|--------------|-----|-----|-----|-----|-----|-----|-----|-----|-----|-----|-----|-----|-----|-----|-----|
| PERV (1,668) | -5  | -4  | -3  | -2  | -1  | 0   | 1   | 2   | 3   | 4   | 5   | 6   | 7   | 8   | 9   |
| A            | 93  | 87  | 46  | 95  | 48  | 72  | 75  | 132 | 35  | 56  | 189 | 53  | 66  | 73  | 71  |
| C            | 116 | 109 | 184 | 34  | 69  | 127 | 104 | 88  | 198 | 273 | 51  | 150 | 160 | 129 | 150 |
| G            | 136 | 146 | 158 | 46  | 283 | 212 | 80  | 98  | 125 | 79  | 34  | 193 | 107 | 114 | 116 |
| T            | 72  | 74  | 54  | 189 | 54  | 30  | 135 | 78  | 81  | 39  | 91  | 48  | 84  | 98  | 83  |
| #-log(P)     | 19  | 24  | 130 | 137 | 295 | 157 | 21  | 16  | 123 | 282 | 134 | 134 | 41  | 15  | 31  |

|              | N   | N   | G   | T/W  | S   | C/V | T   | A/R | G/B | C/S | A    | C   | C   | Y   | C   |
|--------------|-----|-----|-----|------|-----|-----|-----|-----|-----|-----|------|-----|-----|-----|-----|
| XMRV (5,487) | -5  | -4  | -3  | -2   | -1  | 0   | 1   | 2   | 3   | 4   | 5    | 6   | 7   | 8   | 9   |
| A            | 113 | 105 | 92  | 74   | 76  | 115 | 68  | 143 | 38  | 75  | 196  | 93  | 87  | 84  | 84  |
| C            | 95  | 97  | 111 | 47   | 133 | 153 | 88  | 77  | 123 | 142 | 41   | 124 | 119 | 111 | 119 |
| G            | 109 | 113 | 128 | 30   | 131 | 124 | 66  | 104 | 142 | 127 | 55   | 105 | 97  | 89  | 103 |
| T            | 84  | 88  | 81  | 213  | 82  | 31  | 164 | 71  | 118 | 77  | 77   | 87  | 101 | 116 | 101 |
| #-log(P)     | 17  | 10  | 36  | >301 | 81  | 257 | 209 | 105 | 203 | 101 | >301 | 22  | 14  | 22  | 18  |

|              | A   | T   | A/W | D   | G/R | G/V | T/W | A/W | A/W | C/B | C/Y | A/H | T/W | H   | T/H |
|--------------|-----|-----|-----|-----|-----|-----|-----|-----|-----|-----|-----|-----|-----|-----|-----|
| EIAV (1,172) | -5  | -4  | -3  | -2  | -1  | 0   | 1   | 2   | 3   | 4   | 5   | 6   | 7   | 8   | 9   |
| A            | 129 | 108 | 191 | 104 | 116 | 99  | 107 | 140 | 158 | 46  | 76  | 121 | 113 | 109 | 95  |
| C            | 76  | 77  | 21  | 79  | 75  | 127 | 52  | 46  | 51  | 155 | 136 | 104 | 37  | 100 | 98  |
| G            | 80  | 89  | 40  | 105 | 132 | 153 | 49  | 54  | 47  | 125 | 84  | 75  | 21  | 72  | 68  |
| T            | 102 | 116 | 108 | 108 | 80  | 45  | 162 | 131 | 111 | 100 | 110 | 94  | 188 | 110 | 130 |
| #-log(P)     | 10  | 5.2 | 112 | 2.6 | 13  | 40  | 53  | 44  | 52  | 41  | 12  | 6.3 | 113 | 5.0 | 11  |

|                 | N   | N    | T/K  | D    | G    | G/V  | T/W  | W    | A/W  | C/B  | C    | H    | A/M  | V    | N   |
|-----------------|-----|------|------|------|------|------|------|------|------|------|------|------|------|------|-----|
| HIV-1 (335,968) | -5  | -4   | -3   | -2   | -1   | 0    | 1    | 2    | 3    | 4    | 5    | 6    | 7    | 8    | 9   |
| A               | 104 | 83   | 70   | 100  | 93   | 85   | 92   | 119  | 149  | 33   | 76   | 118  | 163  | 103  | 99  |
| C               | 96  | 113  | 62   | 50   | 75   | 113  | 68   | 76   | 67   | 201  | 172  | 128  | 99   | 101  | 106 |
| G               | 102 | 96   | 99   | 126  | 176  | 205  | 68   | 78   | 71   | 119  | 78   | 51   | 64   | 118  | 93  |
| T               | 98  | 111  | 156  | 118  | 74   | 31   | 152  | 114  | 92   | 85   | 89   | 97   | 65   | 82   | 102 |
| #-log(P)        | 71  | >301 | >301 | >301 | >301 | >301 | >301 | >301 | >301 | >301 | >301 | >301 | >301 | >301 | 138 |

|             | C/V | A/V | S/V | T/H | G/V | G/V | T   | N   | V   | C/B | C   | A/D | S   | C/B | C   |
|-------------|-----|-----|-----|-----|-----|-----|-----|-----|-----|-----|-----|-----|-----|-----|-----|
| REV-A (834) | -5  | -4  | -3  | -2  | -1  | 0   | 1   | 2   | 3   | 4   | 5   | 6   | 7   | 8   | 9   |
| A           | 93  | 128 | 105 | 83  | 102 | 88  | 80  | 101 | 115 | 50  | 90  | 147 | 69  | 81  | 85  |
| C           | 148 | 101 | 132 | 115 | 98  | 127 | 96  | 95  | 101 | 167 | 137 | 65  | 137 | 122 | 136 |
| G           | 103 | 111 | 124 | 47  | 159 | 164 | 92  | 115 | 100 | 129 | 107 | 86  | 130 | 102 | 99  |
| T           | 74  | 64  | 57  | 145 | 61  | 48  | 128 | 92  | 84  | 83  | 80  | 87  | 82  | 103 | 92  |
| #-log(P)    | 12  | 11  | 15  | 22  | 20  | 32  | 6.1 | 0.9 | 2.0 | 34  | 7.4 | 17  | 15  | 3.3 | 5.6 |

|           | C   | A/D | G/V | T/W | G/R | G/V | T/H | T/D | A/D | C/Y | C/H | A/W  | C/B  | T/H | A   |
|-----------|-----|-----|-----|-----|-----|-----|-----|-----|-----|-----|-----|------|------|-----|-----|
| SIV (168) | -5  | -4  | -3  | -2  | -1  | 0   | 1   | 2   | 3   | 4   | 5   | 6    | 7    | 8   | 9   |
| A         | 86  | 140 | 75  | 119 | 89  | 87  | 118 | 101 | 160 | 46  | 63  | 168  | 48   | 86  | 122 |
| C         | 120 | 43  | 66  | 23  | 53  | 83  | 68  | 40  | 38  | 257 | 241 | 38   | 214  | 106 | 94  |
| G         | 114 | 86  | 254 | 50  | 232 | 225 | 35  | 72  | 64  | 55  | 26  | 32   | 68   | 68  | 86  |
| T         | 91  | 112 | 44  | 170 | 58  | 37  | 149 | 161 | 106 | 78  | 89  | 122  | 91   | 134 | 92  |
| #-log(P)  | 0.5 | 3.9 | 22  | 11  | 15  | 16  | 6.1 | 6.7 | 7.1 | 23  | 19  | 11.0 | 12.9 | 1.8 | 0.5 |

N S T N G S/V T B V B S N V A S

# Additional File 1: Figure S1 (page 1 of 2)

| ASLV (916) | -5  | -4  | -3  | -2  | -1  | 0   | 1   | 2   | 3   | 4   | 5   | 6   | 7   | 8   | 9   |
|------------|-----|-----|-----|-----|-----|-----|-----|-----|-----|-----|-----|-----|-----|-----|-----|
| A          | 101 | 78  | 80  | 109 | 107 | 71  | 89  | 84  | 106 | 89  | 63  | 93  | 115 | 144 | 85  |
| C          | 88  | 125 | 63  | 95  | 77  | 174 | 91  | 109 | 102 | 101 | 144 | 106 | 106 | 71  | 121 |
| G          | 124 | 124 | 79  | 106 | 129 | 153 | 83  | 100 | 107 | 111 | 138 | 86  | 105 | 78  | 120 |
| T          | 90  | 86  | 159 | 91  | 90  | 40  | 128 | 109 | 88  | 103 | 80  | 112 | 78  | 90  | 87  |
| #-log(P)   | 3.0 | 8.1 | 30  | 0.8 | 5.7 | 59  | 6.2 | 2.0 | 1.0 | 1.0 | 23  | 1.7 | 3.7 | 17  | 5.2 |

  

| HERV-K (1,071) | R   | N   | R   | T   | N   | S   | T   | H   | N   | B   | C/S | V   | A   | C/B | Y   |
|----------------|-----|-----|-----|-----|-----|-----|-----|-----|-----|-----|-----|-----|-----|-----|-----|
|                | -5  | -4  | -3  | -2  | -1  | 0   | 1   | 2   | 3   | 4   | 5   | 6   | 7   | 8   | 9   |
| A              | 121 | 104 | 109 | 73  | 90  | 84  | 92  | 97  | 102 | 88  | 68  | 113 | 132 | 68  | 89  |
| C              | 89  | 90  | 80  | 90  | 105 | 130 | 99  | 106 | 100 | 102 | 140 | 108 | 89  | 139 | 125 |
| G              | 112 | 108 | 132 | 67  | 120 | 135 | 78  | 79  | 101 | 107 | 128 | 101 | 95  | 97  | 81  |
| T              | 79  | 98  | 84  | 158 | 93  | 70  | 124 | 114 | 97  | 106 | 85  | 81  | 80  | 108 | 107 |
| #-log(P)       | 6.6 | 0.6 | 8.4 | 33  | 2.4 | 17  | 6.1 | 3.2 | 0.0 | 1.2 | 19  | 3.3 | 9.4 | 14  | 5.0 |

  

| HTLV-1 (6,820) | A   | R   | G/V  | T/H  | G/V | G/V | R   | W   | A   | B   | C/B | C/B | A/W  | C/B  | Y   |
|----------------|-----|-----|------|------|-----|-----|-----|-----|-----|-----|-----|-----|------|------|-----|
|                | -5  | -4  | -3   | -2   | -1  | 0   | 1   | 2   | 3   | 4   | 5   | 6   | 7    | 8    | 9   |
| A              | 130 | 116 | 115  | 78   | 95  | 101 | 117 | 109 | 132 | 84  | 61  | 70  | 196  | 38   | 85  |
| C              | 85  | 75  | 101  | 61   | 112 | 110 | 89  | 72  | 77  | 114 | 146 | 142 | 41   | 174  | 130 |
| G              | 96  | 118 | 171  | 36   | 145 | 154 | 119 | 75  | 76  | 93  | 110 | 115 | 59   | 116  | 76  |
| T              | 83  | 90  | 37   | 195  | 68  | 54  | 78  | 128 | 99  | 112 | 100 | 90  | 78   | 101  | 112 |
| #-log(P)       | 57  | 42  | >301 | >301 | 107 | 182 | 46  | 78  | 78  | 24  | 132 | 102 | >301 | >301 | 59  |

  

| MMTV (178,574) | N   | N   | N    | Y    | N   | N    | T    | N    | N   | N   | C    | C    | N   | Y    | T    |
|----------------|-----|-----|------|------|-----|------|------|------|-----|-----|------|------|-----|------|------|
|                | -5  | -4  | -3   | -2   | -1  | 0    | 1    | 2    | 3   | 4   | 5    | 6    | 7   | 8    | 9    |
| A              | 101 | 99  | 106  | 87   | 91  | 91   | 91   | 88   | 91  | 94  | 77   | 83   | 105 | 77   | 90   |
| C              | 102 | 96  | 88   | 105  | 106 | 114  | 94   | 103  | 106 | 110 | 127  | 127  | 102 | 122  | 99   |
| G              | 102 | 97  | 113  | 88   | 113 | 113  | 92   | 94   | 103 | 98  | 109  | 101  | 91  | 80   | 89   |
| T              | 96  | 106 | 94   | 118  | 97  | 90   | 119  | 113  | 103 | 101 | 98   | 98   | 100 | 123  | 119  |
| #-log(P)       | 30  | 58  | >301 | >301 | 262 | >301 | >301 | >301 | 135 | 131 | >301 | >301 | 95  | >301 | >301 |

  >140%  
  <60%  
**bold** P value vs random <math><0.05 = -\log\_{10}(P) >1.301</math>  
\* Number of unique samples per virus

## Additional File 1: Figure S1 (page 2 of 2)
