# Supplementary material for: Key determinants of target DNA recognition by retroviral intasomes
Source: PubMed Central journal article supplement (PMC4422553; doi:10.1186/s12977-015-0167-3), 2015-04-30
Supplement: 12977_2015_167_MOESM3_ESM.pdf [file 12977_2015_167_MOESM3_ESM.pdf]

**Table S1 *P* values for comparison of retroviral integration site distributions versus MRC**

| Library                 | Within Refseq genes | Within 5 kb (+/- 2.5 kb) of CpG (%) | Within 5 kb (+/- 2.5 kb) of TSS (%) | Average gene density per Mb (+/- 0.5 Mb) of integration sites |
|-------------------------|---------------------|-------------------------------------|-------------------------------------|---------------------------------------------------------------|
| PFV                     | 7.06E-09            | 1.16E-108                           | 5.88E-85                            | 2.95E-24                                                      |
| PFV ( <i>in vitro</i> ) | 2.81E-07            | 1.73E-23                            | <b>0.077</b>                        | 1.60E-60                                                      |
| MoMLV                   | >2.2E-308           | >2.2E-308                           | >2.2E-308                           | >2.2E-308                                                     |
| PERV                    | 2.23E-17            | >2.2E-308                           | >2.2E-308                           | >2.2E-308                                                     |
| XMRV                    | 5.84E-54            | 2.54E-307                           | >2.2E-308                           | >2.2E-308                                                     |
| EIAV                    | 3.62E-19            | 0.025                               | <b>0.137</b>                        | 4.49E-25                                                      |
| HIV-1                   | >2.2E-308           | 3.39E-78                            | 3.37E-51                            | >2.2E-308                                                     |
| Rev-A                   | 8.98E-40            | <b>0.675</b>                        | <b>0.591</b>                        | 4.68E-59                                                      |
| SIV                     | 5.22E-08            | 1.65E-96                            | 2.12E-90                            | 3.94E-77                                                      |
| ASLV                    | 5.05E-11            | 1.65E-96                            | <b>0.939</b>                        | 1.62E-09                                                      |
| HERV-K                  | 1.72E-03            | 9.84E-24                            | 5.73E-12                            | 5.53E-112                                                     |
| HTLV-1                  | <b>0.468</b>        | 1.49E-28                            | 8.10E-12                            | 3.33E-40                                                      |
| MMTV                    | 3.51E-282           | 9.94E-21                            | 7.66E-62                            | >2.2E-308                                                     |

## Additional File 3: TABLE S1
