# Supplementary material for: Key determinants of target DNA recognition by retroviral intasomes
Source: PubMed Central journal article supplement (PMC4422553; doi:10.1186/s12977-015-0167-3), 2015-04-30
Supplement: 12977_2015_167_MOESM4_ESM.pdf [file 12977_2015_167_MOESM4_ESM.pdf]

|                          |     |                        |                        |
|--------------------------|-----|------------------------|------------------------|
| Within<br>RefSeq<br>Gene | MRC | <b>Infection</b>       | <b>In Vitro</b>        |
|                          |     | $7.06 \times 10^{-09}$ | $2.81 \times 10^{-07}$ |
|                          |     | <b>Infection</b>       | $3.20 \times 10^{-13}$ |

|                                    |     |                         |                        |
|------------------------------------|-----|-------------------------|------------------------|
| $\pm 2.5$ kB<br>of a CpG<br>Island | MRC | <b>Infection</b>        | <b>In Vitro</b>        |
|                                    |     | $1.16 \times 10^{-108}$ | $1.73 \times 10^{-23}$ |
|                                    |     | <b>Infection</b>        | $2.37 \times 10^{-60}$ |

|                          |     |                        |                        |
|--------------------------|-----|------------------------|------------------------|
| $\pm 2.5$ kB<br>of a TSS | MRC | <b>In Vitro</b>        | <b>In Vitro</b>        |
|                          |     | $5.88 \times 10^{-85}$ | <b>0.08</b>            |
|                          |     | <b>Infection</b>       | $5.16 \times 10^{-67}$ |

|                  |     |                        |                        |
|------------------|-----|------------------------|------------------------|
| Avg.<br>Genes/Mb | MRC | <b>Infection</b>       | <b>In Vitro</b>        |
|                  |     | $2.95 \times 10^{-24}$ | $1.60 \times 10^{-60}$ |
|                  |     | <b>Infection</b>       | $2.61 \times 10^{-04}$ |

## Additional File 4: FIGURE S3
