# Supplementary material for: Key determinants of target DNA recognition by retroviral intasomes
Source: PubMed Central journal article supplement (PMC4422553; doi:10.1186/s12977-015-0167-3), 2015-04-30
Supplement: 12977_2015_167_MOESM5_ESM.pdf [file 12977_2015_167_MOESM5_ESM.pdf]

|                                |     |                          |                           |                           |                           |                           |                           |
|--------------------------------|-----|--------------------------|---------------------------|---------------------------|---------------------------|---------------------------|---------------------------|
| Within<br>RefSeq<br>Gene       | MRC | Rev-A                    | MoMLV                     | XMRV                      | PERV                      | PFV                       | HIV-1                     |
|                                |     | 5.22 x 10 <sup>-08</sup> | <2.2 x 10 <sup>-308</sup> | 5.84 x 10 <sup>-54</sup>  | 2.23 x 10 <sup>-17</sup>  | 7.06 x 10 <sup>-09</sup>  | <2.2 x 10 <sup>-308</sup> |
|                                |     | Rev-A                    | 0.14                      | 0.57                      | 0.67                      | 4.47 x 10 <sup>-14</sup>  | 9.08 x 10 <sup>-34</sup>  |
|                                |     | MoMLV                    | 0.03                      | 0.19                      | 2.92 x 10 <sup>-75</sup>  | <2.2 x 10 <sup>-308</sup> |                           |
|                                |     | XMRV                     | 0.93                      | 7.17 x 10 <sup>-44</sup>  | 7.24 x 10 <sup>-187</sup> |                           |                           |
|                                |     | PERV                     | 6.89 x 10 <sup>-25</sup>  | 1.24 x 10 <sup>-59</sup>  |                           |                           |                           |
|                                |     | PFV                      | <2.2 x 10 <sup>-308</sup> |                           |                           |                           |                           |
| ± 2.5 kB<br>of a CpG<br>Island | MRC | Rev-A                    | MoMLV                     | XMRV                      | PERV                      | PFV                       | HIV-1                     |
|                                |     | 1.65 x 10 <sup>-96</sup> | <2.2 x 10 <sup>-308</sup> | 2.54 x 10 <sup>-307</sup> | <2.2 x 10 <sup>-308</sup> | 1.16 x 10 <sup>-108</sup> | 3.39 x 10 <sup>-78</sup>  |
|                                |     | Rev-A                    | 0.12                      | 1.68 x 10 <sup>-06</sup>  | 1.98 x 10 <sup>-28</sup>  | 1.26 x 10 <sup>-11</sup>  | 3.05 x 10 <sup>-80</sup>  |
|                                |     | MoMLV                    | 4.89 x 10 <sup>-57</sup>  | 4.67 x 10 <sup>-66</sup>  | 2.07 x 10 <sup>-58</sup>  | <2.2 x 10 <sup>-308</sup> |                           |
|                                |     | XMRV                     | 1.03 x 10 <sup>-122</sup> | 1.86 x 10 <sup>-04</sup>  | <2.2 x 10 <sup>-308</sup> |                           |                           |
|                                |     | PERV                     | 4.16 x 10 <sup>-127</sup> | <2.2 x 10 <sup>-308</sup> |                           |                           |                           |
|                                |     | PFV                      | 8.56 x 10 <sup>-81</sup>  |                           |                           |                           |                           |
| ± 2.5 kB<br>of a TSS           | MRC | Rev-A                    | MoMLV                     | XMRV                      | PERV                      | PFV                       | HIV-1                     |
|                                |     | 2.12 x 10 <sup>-90</sup> | <2.2 x 10 <sup>-308</sup> | <2.2 x 10 <sup>-308</sup> | <2.2 x 10 <sup>-308</sup> | 5.88 x 10 <sup>-85</sup>  | 3.37 x 10 <sup>-51</sup>  |
|                                |     | Rev-A                    | 0.23                      | 1.4 x 10 <sup>-04</sup>   | 3.31 x 10 <sup>-13</sup>  | 1.26 x 10 <sup>-13</sup>  | 1.09 x 10 <sup>-104</sup> |
|                                |     | MoMLV                    | 9.43 x 10 <sup>-37</sup>  | 4.54 x 10 <sup>-28</sup>  | 1.86 x 10 <sup>-62</sup>  | <2.2 x 10 <sup>-308</sup> |                           |
|                                |     | XMRV                     | 3.01 x 10 <sup>-60</sup>  | 2.79 x 10 <sup>-10</sup>  | <2.2 x 10 <sup>-308</sup> |                           |                           |
|                                |     | PERV                     | 6.24 x 10 <sup>-85</sup>  | <2.2 x 10 <sup>-308</sup> |                           |                           |                           |
|                                |     | PFV                      | 2.78 x 10 <sup>-108</sup> |                           |                           |                           |                           |
| Avg.<br>Genes/Mb               | MRC | Rev-A                    | MoMLV                     | XMRV                      | PERV                      | PFV                       | HIV-1                     |
|                                |     | 1.24 x 10 <sup>-06</sup> | <2.2 x 10 <sup>-308</sup> | 8.53 x 10 <sup>-76</sup>  | 0.41                      | 1.61 x 10 <sup>-06</sup>  | 5.42 x 10 <sup>-13</sup>  |
|                                |     | Rev-A                    | 0.03                      | 0.03                      | 9.39 x 10 <sup>-06</sup>  | 0.05                      | 1.61 x 10 <sup>-05</sup>  |
|                                |     | MoMLV                    | 0.92                      | 1.01 x 10 <sup>-25</sup>  | 3.35 x 10 <sup>-16</sup>  | <2.2 x 10 <sup>-308</sup> |                           |
|                                |     | XMRV                     | 3.17 x 10 <sup>-21</sup>  | 5.85 x 10 <sup>-12</sup>  | 4.46 x 10 <sup>-65</sup>  |                           |                           |
|                                |     | PERV                     | 4.0 x 10 <sup>-04</sup>   | 0.11                      |                           |                           |                           |
|                                |     | PFV                      | 1.4 x 10 <sup>-04</sup>   |                           |                           |                           |                           |

## Additional File 5: FIGURE S4
