# Supplementary material for: Key determinants of target DNA recognition by retroviral intasomes
Source: PubMed Central journal article supplement (PMC4422553; doi:10.1186/s12977-015-0167-3), 2015-04-30
Supplement: 12977_2015_167_MOESM6_ESM.pdf [file 12977_2015_167_MOESM6_ESM.pdf]

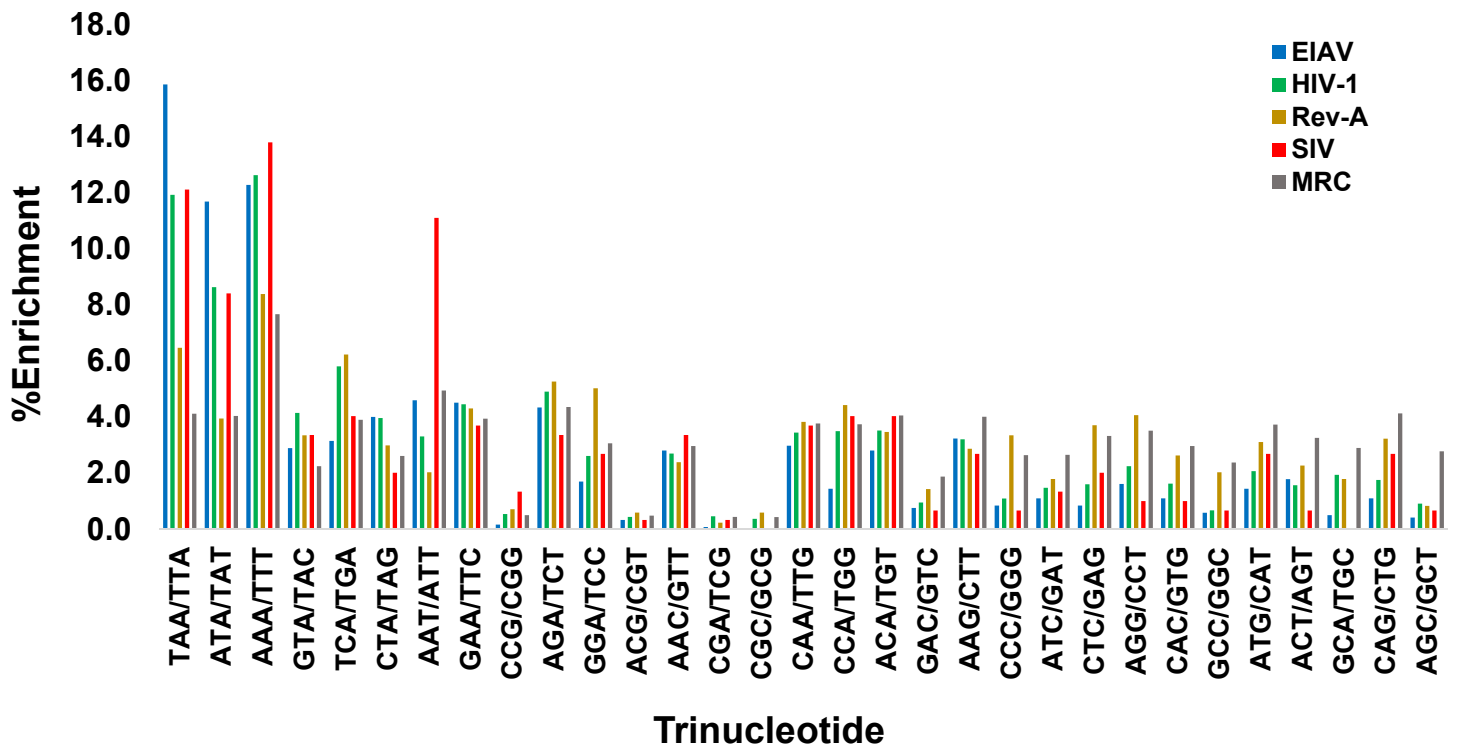

**Additional File 6: FIGURE S5**
