# Supplementary material for: Key determinants of target DNA recognition by retroviral intasomes
Source: PubMed Central journal article supplement (PMC4422553; doi:10.1186/s12977-015-0167-3), 2015-04-30
Supplement: 12977_2015_167_MOESM7_ESM.pdf [file 12977_2015_167_MOESM7_ESM.pdf]

**A**

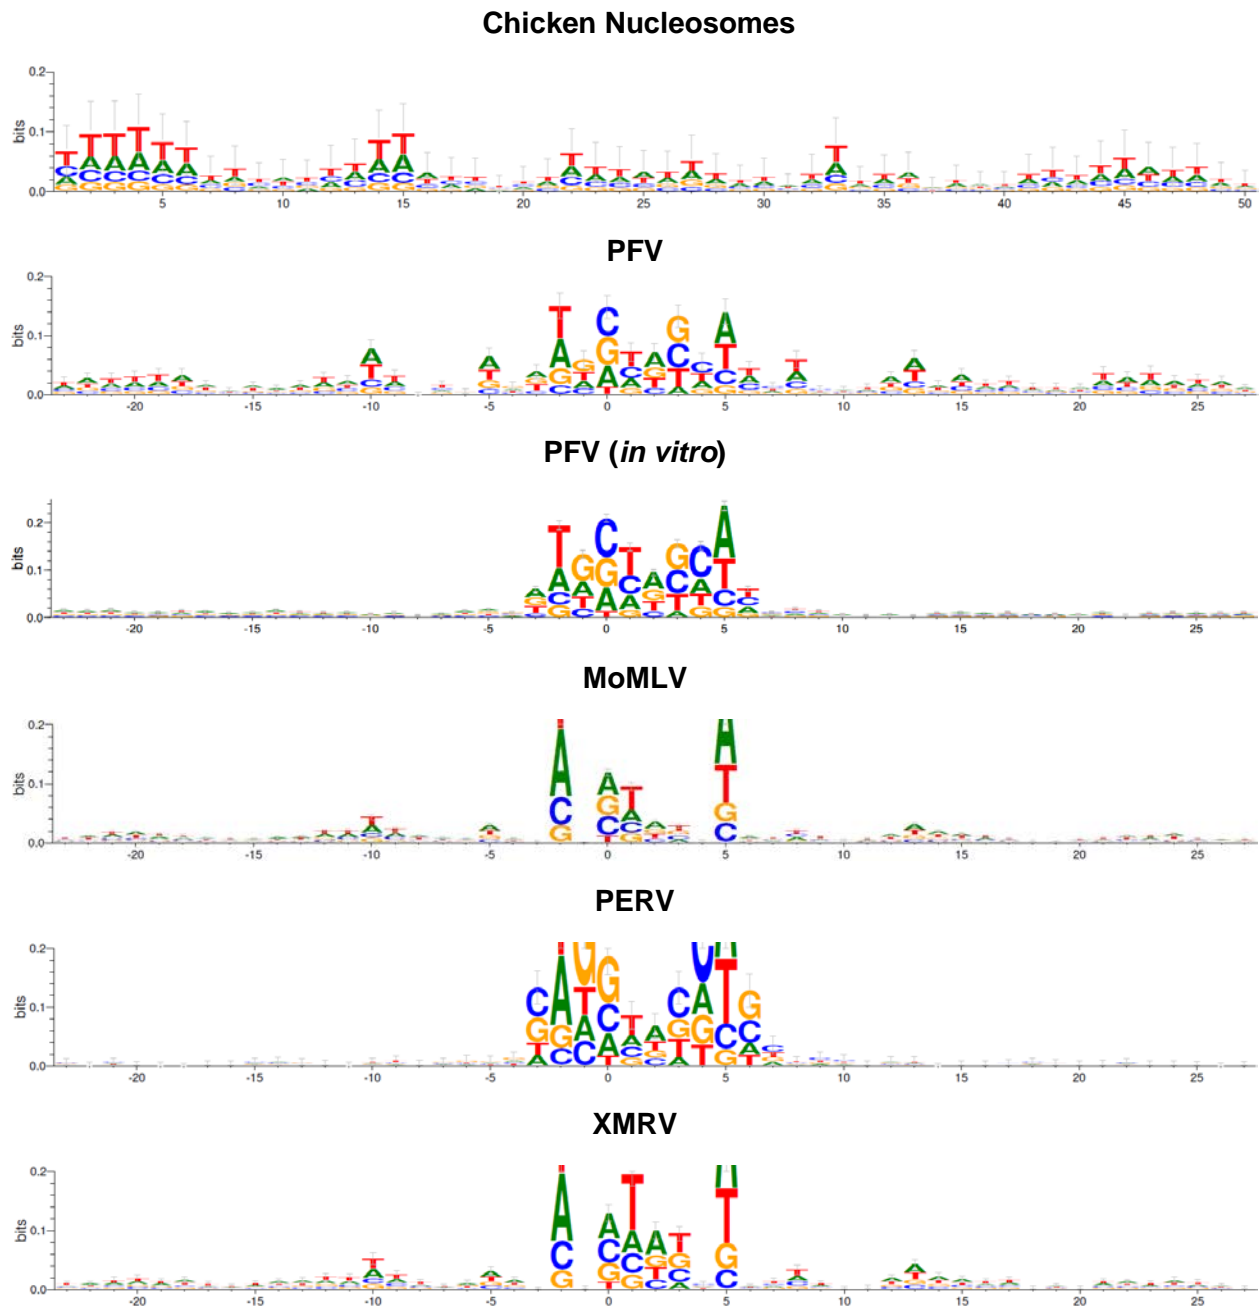

**Additional File 7: FIGURE S6 (page 1 of 3)**

**B**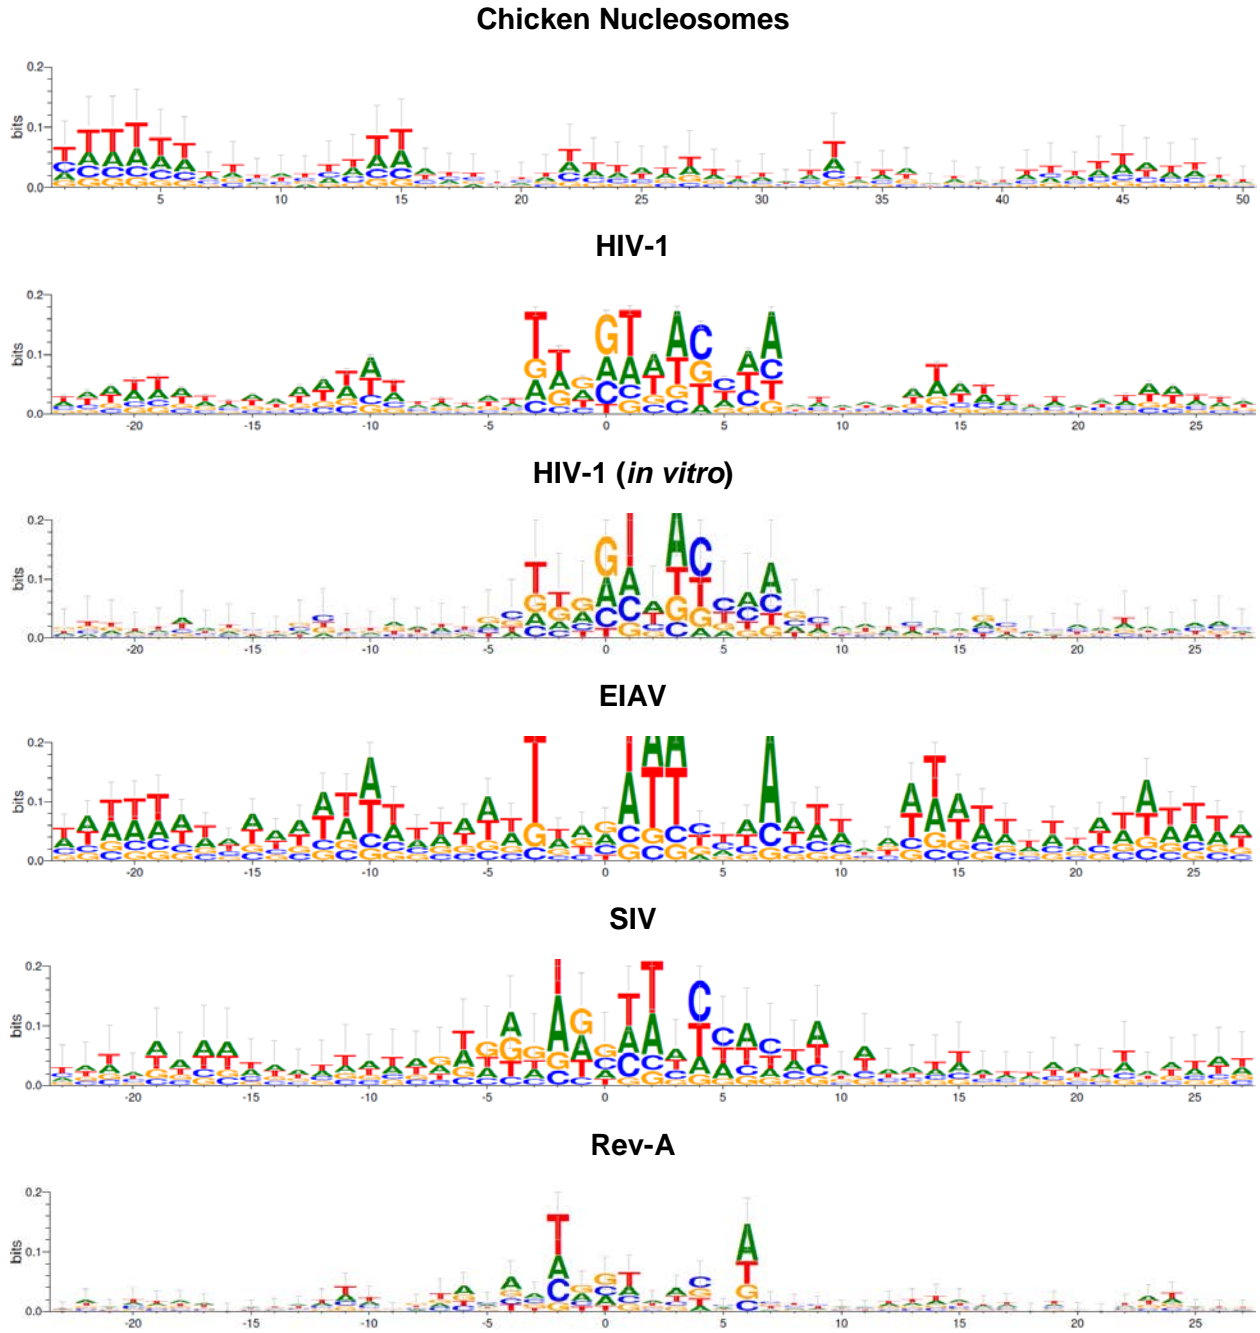

**Additional File 7: FIGURE S6 (page 2 of 3)**

**C**

**Chicken Nucleosomes**

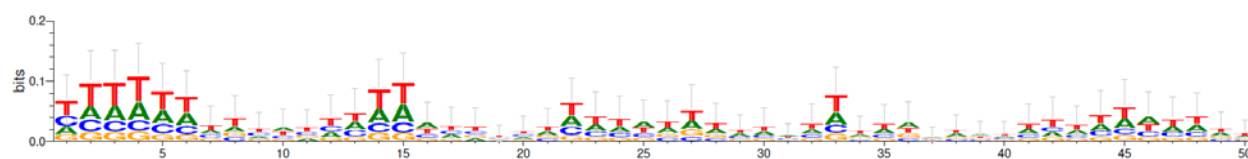

**ASLV**

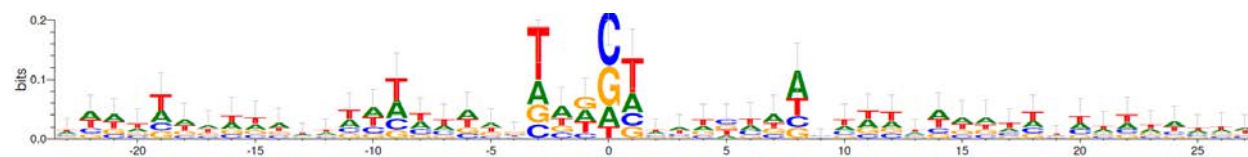

**HERV-K**

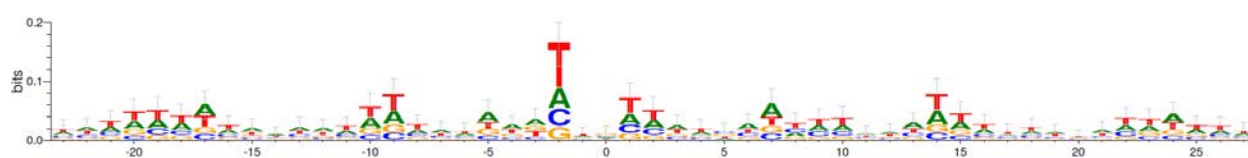

**HTLV-1**

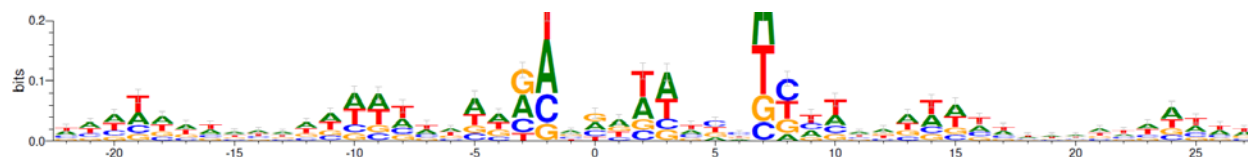

**MMTV**

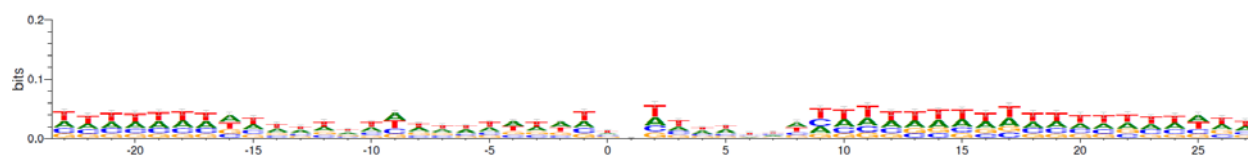

**Additional File 7: FIGURE S6 (page 3 of 3)**
