# Supplementary material for: Key determinants of target DNA recognition by retroviral intasomes
Source: PubMed Central journal article supplement (PMC4422553; doi:10.1186/s12977-015-0167-3), 2015-04-30
Supplement: 12977_2015_167_MOESM8_ESM.pdf [file 12977_2015_167_MOESM8_ESM.pdf]

|        |     | $\beta 4^*$ | $\alpha 2$  | $\alpha 3$ |     |
|--------|-----|-------------|-------------|------------|-----|
| PFV    | 179 | PKVIHSDQGA  | AAFTSSTFAEF |            | 198 |
| MoMLV  | 178 | PQVLGTDNGP  | PAFVSKVSQSV |            | 197 |
| PERV   | 176 | PKVIGSDNGP  | PAFVAQVSQGL |            | 195 |
| XMRV   | 178 | PQVLGSDNGP  | PAFASQVSQSV |            | 197 |
| EIAV   | 110 | PKSLHTDNGT  | NFVAEPVVNL  |            | 129 |
| HIV-1  | 110 | VKTVHTDNGS  | NFTSTTVKAA  |            | 129 |
| REV-A  | 176 | PVQIGSDNGP  | PAFVAKVTQQL |            | 195 |
| SIV    | 110 | VKHIHTDNGP  | NFISKDVEAV  |            | 129 |
| ASLV   | 115 | PKAIKTDNGS  | CFSTSKSTREW |            | 134 |
| HERV-K | 117 | PEKIKTDNGP  | PGYCSKAFQKF |            | 136 |
| HTLV-1 | 120 | PSYINTDNGP  | PAYISQDFLNM |            | 139 |
| MMTV   | 119 | PQKIKTDNAP  | PAYVRSIQEF  |            | 138 |

CCD

Additional File 8: FIGURE S7
